# Supplementary material
Source: publisher figshare collection journal article supplement (https://frontiersin.figshare.com/ndownloader/files/35023108)
Supplement: Supplementary file [file 35023108]

## Supplementary Materials

**Supplementary Table S1.** Basic information of interviewees.

| No. | Code | Year of birth | Before studying abroad | Year going abroad | Year of return | Residence       | Occupation                    | Interview (mins.) | Words  |
|-----|------|---------------|------------------------|-------------------|----------------|-----------------|-------------------------------|-------------------|--------|
| 1   | CL   | 1982          | Undergraduate          | 2007              | 2011           | China           | Freelance artist              | 181               | 32,367 |
| 2   | CRB  | 1970          | Undergraduate          | 1992              | 1998           | Germany & China | Freelance artist              | 74                | 10,424 |
| 3   | CYF  | 1962          | Museum staff           | 1997              | 1999           | China           | Associate professor           | 96                | 15,449 |
| 4   | DGY  | 1957          | Teacher                | 1995              | 1998           | China           | Dean, professor               | 106               | 18,674 |
| 5   | LD   | 1963          | Teacher                | 1990              | 1995           | China           | Freelance artist              | 136               | 25,412 |
| 6   | LH   | 1984          | Freelance artist       | 2009              | 2010           | China           | Freelance artist              | 87                | 14,773 |
| 7   | LJ   | 1963          | Freelance artist       | 1989              | 2006           | China           | Freelance artist              | 152               | 27,391 |
| 8   | LYG  | 1964          | Teacher                | 1992              | 1997           | Germany & China | Freelance artist              | 161               | 28,195 |
| 9   | ML   | 1958          | Undergraduate          | 1982              | 1984           | China           | Associate director, professor | 102               | 18,754 |
| 10  | MSQ  | 1956          | Teacher                | 1989              | 1995           | France & China  | Freelance artist              | 98                | 17,386 |
| 11  | MXC  | 1964          | Freelance artist       | 1995              | 1999           | China           | Professor                     | 95                | 16,739 |
| 12  | QAX  | 1972          | Freelance artist       | 1998              | 2003           | China           | Freelance artist              | 83                | 14,744 |

|    |     |      |                  |      |      |                 |                              |     |        |
|----|-----|------|------------------|------|------|-----------------|------------------------------|-----|--------|
| 13 | RR  | 1960 | Undergraduate    | 1986 | n/a  | Germany & China | Professor                    | 104 | 17,285 |
| 14 | SZ  | 1965 | Government staff | 1991 | 2003 | China           | Associate dean,<br>professor | 124 | 19,634 |
| 15 | TP  | 1960 | Teacher          | 1989 | 1994 | China           | Associate dean,<br>Professor | 108 | 18,111 |
| 16 | TF  | 1963 | Teacher          | 1990 | 1995 | China           | Professor                    | 113 | 18,560 |
| 17 | TX  | 1976 | Undergraduate    | 2000 | 2005 | China           | Professor                    | 121 | 20,300 |
| 18 | WCY | 1959 | Teacher          | 1991 | 1995 | Germany & China | Professor                    | 153 | 25,409 |
| 19 | WXH | 1957 | Teacher          | 1987 | 1992 | Germany & China | Professor                    | 87  | 15,715 |
| 20 | WXS | 1964 | Designer         | 1990 | 2003 | China           | Professor                    | 186 | 33,024 |
| 21 | XH  | 1972 | Designer         | 2004 | 2010 | China           | Associate professor          | 148 | 25,814 |
| 22 | XJ  | 1955 | Teacher          | 1988 | 1989 | China           | Dean, professor              | 102 | 17,089 |
| 23 | YJS | 1955 | Freelance artist | 1991 | 1996 | China           | Curator, professor           | 98  | 17,424 |
| 24 | YQ  | 1952 | Teacher          | 1987 | n/a  | Germany & China | Professor                    | 162 | 28,561 |
| 25 | YCG | 1955 | Teacher          | 1990 | 1997 | China           | Director, professor          | 179 | 29,037 |
| 26 | YXZ | 1976 | Trainer          | 2002 | 2006 | China           | Professor                    | 147 | 25,129 |
| 27 | ZGL | 1957 | Teacher          | 1991 | 1997 | China           | Professor                    | 95  | 16,941 |
| 28 | ZJS | 1954 | Freelance artist | 1986 | 1990 | China           | Freelance artist             | 87  | 15,868 |
| 29 | ZQS | 1957 | Teacher          | 1990 | 1995 | China           | Director, professor          | 146 | 25,157 |

**Supplementary Table S2.** Stage model of deep cross-cultural reconstruction among culture and art scholars.

| Stage name             | Stage connotation                                                                                                                                                                                                                                                                                                           |
|------------------------|-----------------------------------------------------------------------------------------------------------------------------------------------------------------------------------------------------------------------------------------------------------------------------------------------------------------------------|
| Cultural admiration    | The stage from the time of the art scholars' initial contact with Western art and culture to their intense curiosity and yearning for cross-cultural learning.                                                                                                                                                              |
| Cultural shock         | The stage in which the thoughts of different cultures and arts invade the cultural system of the scholars, bringing about great shock and initial influence.                                                                                                                                                                |
| Cultural adaptation    | The stage of immersive contact with a different culture, continuous adjustment to cultural conflicts and role expectations, changes in and adaptation of behavioral patterns, and the acquisition of social culture and skills for life–learning–work adaptation.                                                           |
| Cultural stranding     | The stage in which, with gradually deepening understanding of different cultures, profound differences between the home and foreign cultures begin to appear, making integration difficult and causing stagnation and confusion.                                                                                            |
| Cultural excavation    | The stage in which culture and art scholars begin to seek a breakthrough after confusion; they continue to explore in two directions—absorption of different cultures and reconstruction of the original culture—seeking balance in contradictions and a new direction in their art creation.                               |
| Cultural recombination | The stage in which, after developing cognitive complexity and structurally improving their abilities to process home and foreign cultural information, cultural and art scholars reorganize Chinese and Western cultures, construct new cultural DNA, and form new cultural patterns and individualized artistic languages. |
| Cultural integration   | The stage by which culture and art scholars deeply extract, integrate, and generate new culture from the Chinese and Western cultures that affect them, creating cultural content and exerting cultural influence from the perspectives of both cultures.                                                                   |

**Supplementary Table S3.** Driver–strategy–outcome in cultural admiration stage.

| Cultural admiration | Conceptualization                                     |                                                                                                                                                                                  | Typical descriptions in the original text                                                                                                                                                                                                                                                                                                                                                                                               |
|---------------------|-------------------------------------------------------|----------------------------------------------------------------------------------------------------------------------------------------------------------------------------------|-----------------------------------------------------------------------------------------------------------------------------------------------------------------------------------------------------------------------------------------------------------------------------------------------------------------------------------------------------------------------------------------------------------------------------------------|
| Driver              | Attracted by different cultures                       |                                                                                                                                                                                  | <p>“I always thought it must be very mysterious, so I want to go abroad.” (ML)</p> <p>“I want to learn more and optimize myself.” (SZ)</p> <p>“I desire to understand Western culture deeper.” (CYF)</p>                                                                                                                                                                                                                                |
| Strategy            | Adaptation of different cultures:<br>Contact strategy | <p>Interpersonal:<br/>Consult teachers and seniors with overseas experience</p> <p>Cultural matters:<br/>Attend exhibitions on campus and borrow books and album of painting</p> | <p>“I was interested in those teachers who came back from Germany, and then became friends with them.” (CL)</p> <p>“At that time, after returning from Germany, Ma Lu made an exhibition, which touched me a lot.” (LD)</p> <p>“I got some information about Germany from books.” (YXZ)</p> <p>“At that time, our school had many international exchange activities, exhibitions and lectures, and we often listened to them.” (SZ)</p> |
|                     | Reconstruction of the original culture                | Temporarily not covered                                                                                                                                                          |                                                                                                                                                                                                                                                                                                                                                                                                                                         |
| Outcome             | Study abroad                                          |                                                                                                                                                                                  | <p>“I took the train from Beijing, through Ulaanbaatar to Moscow, Moscow to Poland, Poland to East Germany, East Germany to West Germany.” (WXS)</p> <p>“I went to Germany just after I got married.” (RR)</p>                                                                                                                                                                                                                          |

**Supplementary Table S4.** Driver–strategy–outcome in cultural shock stage.

| Cultural shock | Conceptualization                          |                     |                                                                                                                    | Typical descriptions in the original text                                                                                                                                                                                                                              |
|----------------|--------------------------------------------|---------------------|--------------------------------------------------------------------------------------------------------------------|------------------------------------------------------------------------------------------------------------------------------------------------------------------------------------------------------------------------------------------------------------------------|
| Driver         | Adapt to the differences                   |                     |                                                                                                                    | <p>“When I got there, I went to the museum and realized it was different than I thought.” (LYG)</p> <p>“There was too much information when I got there, a lot of struggle, I felt confused.” (XH)</p>                                                                 |
| Strategy       | Adaptation of different cultures           | Acceptance strategy | “Blindly” following the flood of information                                                                       | <p>“I didn’t understand anything, but they impressed me and I was moved.” (LH)</p> <p>“I got feelings about new stuff too, then I pretended I was entering the flow state.” (TP)</p>                                                                                   |
|                |                                            | Adjustment strategy | Interpersonal: Socialize with classmates                                                                           | <p>“At the beginning, I hardly dared open my mouth to talk, but I gradually communicated with my classmates.” (ML)</p> <p>“Before I could find any place suitable, I stayed with him [a German student named Leica].” (MSQ)</p>                                        |
|                |                                            |                     | Cultural matters: Learn language, take a part-time job, become familiar with the environment, and broaden horizons | <p>“When you go to a strange country, language is the most important thing.” (RR)</p> <p>“At first I didn’t know any better, so I went to many places by myself.” (LH)</p> <p>“Working to earn money is one thing, but to experience life is more important.” (SZ)</p> |
| Outcome        | Reconstruction of the original culture     |                     |                                                                                                                    | Temporarily not covered                                                                                                                                                                                                                                                |
|                | Surface-structure sociocultural adaptation |                     |                                                                                                                    | <p>“It opened up your mind and your freedom.” (XH)</p> <p>“My basic problem was language. In fact, once this was crossed, I didn’t think there would be too big a problem in communication” (LD)</p>                                                                   |

**Supplementary Table S5.** Driver–strategy–outcome in cultural adaptation stage.

| Cultural adaptation | Conceptualization                            | Typical descriptions in the original text                                                                                                                                                                                                                                         |
|---------------------|----------------------------------------------|-----------------------------------------------------------------------------------------------------------------------------------------------------------------------------------------------------------------------------------------------------------------------------------|
| Adaptive state      | Changes in behavior patterns                 | “From the overall state, at that time my learning and adaptation to the society have reached a stage...my behavior actually changed a lot.” (SZ)                                                                                                                                  |
|                     | The acquisition of social culture and skills | “Some artists went out on the street and made a lot of money a day, which was definitely a huge temptation, but once you start on this road, you will not do art anymore.... However, through this you can relate to that society.” (MXC)                                         |
|                     | Adaptation to life, work, and study          | “We’re going to learn Western stuff, but it’s superficial to just take and learn the result. In fact, there is always another thought behind the form, but it is often ignored; people do not always think deeply about its relationship to philosophy or even to science.” (QAX) |

**Supplementary Table S6.** Driver–strategy–outcome of the cultural stranding stage.

| Cultural stranding | Conceptualization                                                                                                              |                                                                                                                                                                                                                   | Typical descriptions in the original text                                                                                                                                                                                                                                                                                                                                                                                                                                                                                                                                                                                                                                                                                                    |
|--------------------|--------------------------------------------------------------------------------------------------------------------------------|-------------------------------------------------------------------------------------------------------------------------------------------------------------------------------------------------------------------|----------------------------------------------------------------------------------------------------------------------------------------------------------------------------------------------------------------------------------------------------------------------------------------------------------------------------------------------------------------------------------------------------------------------------------------------------------------------------------------------------------------------------------------------------------------------------------------------------------------------------------------------------------------------------------------------------------------------------------------------|
| Driver             | Facing the need for transformation                                                                                             |                                                                                                                                                                                                                   | <p>“Due to the original background of Chinese ink painting, the transformation is still a long-term thing.” (CRB)</p> <p>“No one will pay much attention to it, so there is a sense of cultural loneliness in it.” (DGY)</p> <p>“At that time, I could not turn around and was still in pain.” (CYF)</p>                                                                                                                                                                                                                                                                                                                                                                                                                                     |
| Strategy           | <p>Adaptation of different cultures: absorbing strategy</p> <p>Reconstruction of the original culture: discarding strategy</p> | <p>Interpersonal: Discuss art and culture with professors and classmates</p> <p>Cultural matters: view exhibitions often, imitate masters, add Western elements</p> <p>Discard previous techniques and styles</p> | <p>“The professor said I think you should take it a step further, and I recommend two artists that you can do some research about.” (LH)</p> <p>“You can learn something by communicating with your classmates, sharing thoughts and ideas.” (CL)</p> <p>“I know almost all those paintings so well that I can tell who painted it if I look at it from a distance.” (ML)</p> <p>“Later on, I spent a lot of time looking at paintings in museums every day. I think museums helped me lay the foundation for my future life.” (LH)</p> <p>“So I spent a decade throwing away what I learned and then looking for myself.” (WCY)</p> <p>“You have to give up something to get something, and getting rid of something is painful.” (CRB)</p> |
| Outcome            | A deeper understanding of the different cultures in which they live                                                            |                                                                                                                                                                                                                   | <p>“I don’t need to care too much about cultural differences or conflicts, which will naturally form an individual recognition in you.” (XH)</p> <p>“I think those rigorous things and rational thinking in Germany are a kind of integration for me.” (WXH)</p>                                                                                                                                                                                                                                                                                                                                                                                                                                                                             |

**Supplementary Table S7.** Driver–strategy–outcome in cultural excavation stage.

| Cultural excavation | Conceptualization                                               |                                                                                                          | Typical descriptions in the original text                                                                                                                                                                                                                                                                                                                   |
|---------------------|-----------------------------------------------------------------|----------------------------------------------------------------------------------------------------------|-------------------------------------------------------------------------------------------------------------------------------------------------------------------------------------------------------------------------------------------------------------------------------------------------------------------------------------------------------------|
| Driver              | Find their own positioning based on the lack of positioning     |                                                                                                          | <p>“The professor said your lines were Michelangelo’s. We learned from others and we have never thought about whose lines they were.” (WCY)</p> <p>“My previous pieces looked a little bit like the work of someone else. Take a little inspiration from this artist and copy that artist’s brushwork.” (CL)</p>                                            |
| Strategy            | Adaptation of different cultures: the rational strategy         | Interpersonal: receive guidance from professors and mentors, and contact artists from all over the world | <p>“The professor said that I have shown you so many picture books not for you to study, but to know what has already existed, so that you can recognize what we did wrong today.” (WCY)</p> <p>“I also came into contact with artists from various countries and saw their working style, life attitude, and cultivation in the process of art.” (CYF)</p> |
|                     |                                                                 | Cultural matters: learn and absorb pertinently, abandon pure imitation                                   | <p>“This independence produces a kind of self-judgment. Other masters look at a person in their way but I can do it in my way; this is an individual thing.” (SZ)</p>                                                                                                                                                                                       |
|                     | Reconstruction of the original culture: source-tracing strategy | Interpersonal: discuss with individuals with deep insights into Chinese culture                          | <p>“Professor Jerison Newke and I went to Huang Binhong’s hometown. Later, we bought a very thick album of the complete works of Huang Binhong from the second-hand book market of Panjiayuan that had been published by People’s Fine Arts Publishing House. From then on, I gradually began to pay attention to Chinese painting.” (CL)</p>               |
|                     |                                                                 |                                                                                                          | <p>“Lehrer is affectionate about China; he thinks China is a great country. He always mentions that people will have a different</p>                                                                                                                                                                                                                        |



|         |                                                                   |                                                                                                                                                                                                                                                                                             |
|---------|-------------------------------------------------------------------|---------------------------------------------------------------------------------------------------------------------------------------------------------------------------------------------------------------------------------------------------------------------------------------------|
|         |                                                                   | understanding about their own culture when they study abroad.” (QAX)                                                                                                                                                                                                                        |
|         | Cultural matters: dabble in traditional Chinese books             | <p>“I have revisited many of the thoughts of ancient China.” (CRB)</p> <p>“There was a bookstore near the Hamburg train station where I read a lot of traditional Chinese books and engaged in Chinese calligraphy and Chinese culture, including <i>xiangqi</i> [Chinese chess].” (XJ)</p> |
| Outcome | Development of an objective and critical view of the two cultures | <p>“At that time, I found that the East and the West actually had something in common in the spiritual realm.” (CRB)</p> <p>“He’s a professor. He has his own opinions. It’s hard to say whether they’re right or wrong.” (LJ)</p>                                                          |

**Supplementary Table S8.** Driver–strategy–outcome in cultural recombination stage.

| Cultural recombination | Conceptualization                                                                 | Typical descriptions in the original text                                                                                                                                                                                                                                                                                                                   |
|------------------------|-----------------------------------------------------------------------------------|-------------------------------------------------------------------------------------------------------------------------------------------------------------------------------------------------------------------------------------------------------------------------------------------------------------------------------------------------------------|
| Driver                 | Due to the ambiguity of identity, it is necessary to seek cultural identity again | <p>“Those were not my own. I didn’t have a cognitive ability and other things to go far, go wide, and go deep.” (TF)</p> <p>“You have to explore a person’s entire culture in an artistic way. Each person’s growth path is different, and you have to use your method to connect your entire history and find its form, which is a kind of DNA.” (WCY)</p> |
| Strategy               | Remodeling strategy                                                               | <p>“I’ve taken what I know and developed them into my own thing, creating my own feelings, that was the most important thing to do.” (CL)</p> <p>“A lot of things are to be integrated, but not to put them together.” (ML)</p>                                                                                                                             |
| Outcome                | Positioning has been found                                                        | <p>“By that time, I was really feeling it.” (CL)</p> <p>“What I expressed was my relationship to the world.” (YQ)</p> <p>“After this kind of cultural comparison, I found that, in fact, there are many ways to view the world. Although you may be a little bit small, the value is still there.” (YJS)</p>                                                |

**Supplementary Table S9.** Driver–strategy–outcome of the cultural integration stage.

| Cultural integration | Conceptualization                    | Typical descriptions in the original text                                                                                                                                                                                                                                                                                                                                                                                                                                   |
|----------------------|--------------------------------------|-----------------------------------------------------------------------------------------------------------------------------------------------------------------------------------------------------------------------------------------------------------------------------------------------------------------------------------------------------------------------------------------------------------------------------------------------------------------------------|
| Integrated state     | New cultural DNA is generated        | <p>“You don’t have to think about being different, you just have your eyes on the world, and you dig in your way, stringing together your entire history, and you will find the form, and that’s a kind of DNA.”(WCY)</p> <p>“The truth is intertwined at a certain point; it’s something common to all human beings, but approached in different ways, so I don’t feel the need to deliberately emphasize the East and the West.” (MSQ)</p>                                |
|                      | The sublimation of cultural concepts | <p>“I didn’t put myself much within the confines of so-called ethnic areas at that time, because I knew that people are the most important, and people are the same all over the world.” (XH)</p> <p>“So, in a sense, in the spirit of artistic creation, the essence is that you have to be free.” (SZ)</p> <p>“At that time, I found that the East and the West actually had something in common in the spiritual realm, that is, in the realm of free spirit.” (CRB)</p> |
